# Supplementary material for: Antioxidant and Neuroproliferative Effects of THL-3-PTD5 Peptide Derived from Hydramacin-1 Antimicrobial Peptide
Source: Hindawi journal article supplement (doi:10.1155/2024/8897847), 2024-02-24
Supplement: f1 [file 8897847.f1.docx]

**SUPPLEMENTARY INFORMATIONS**


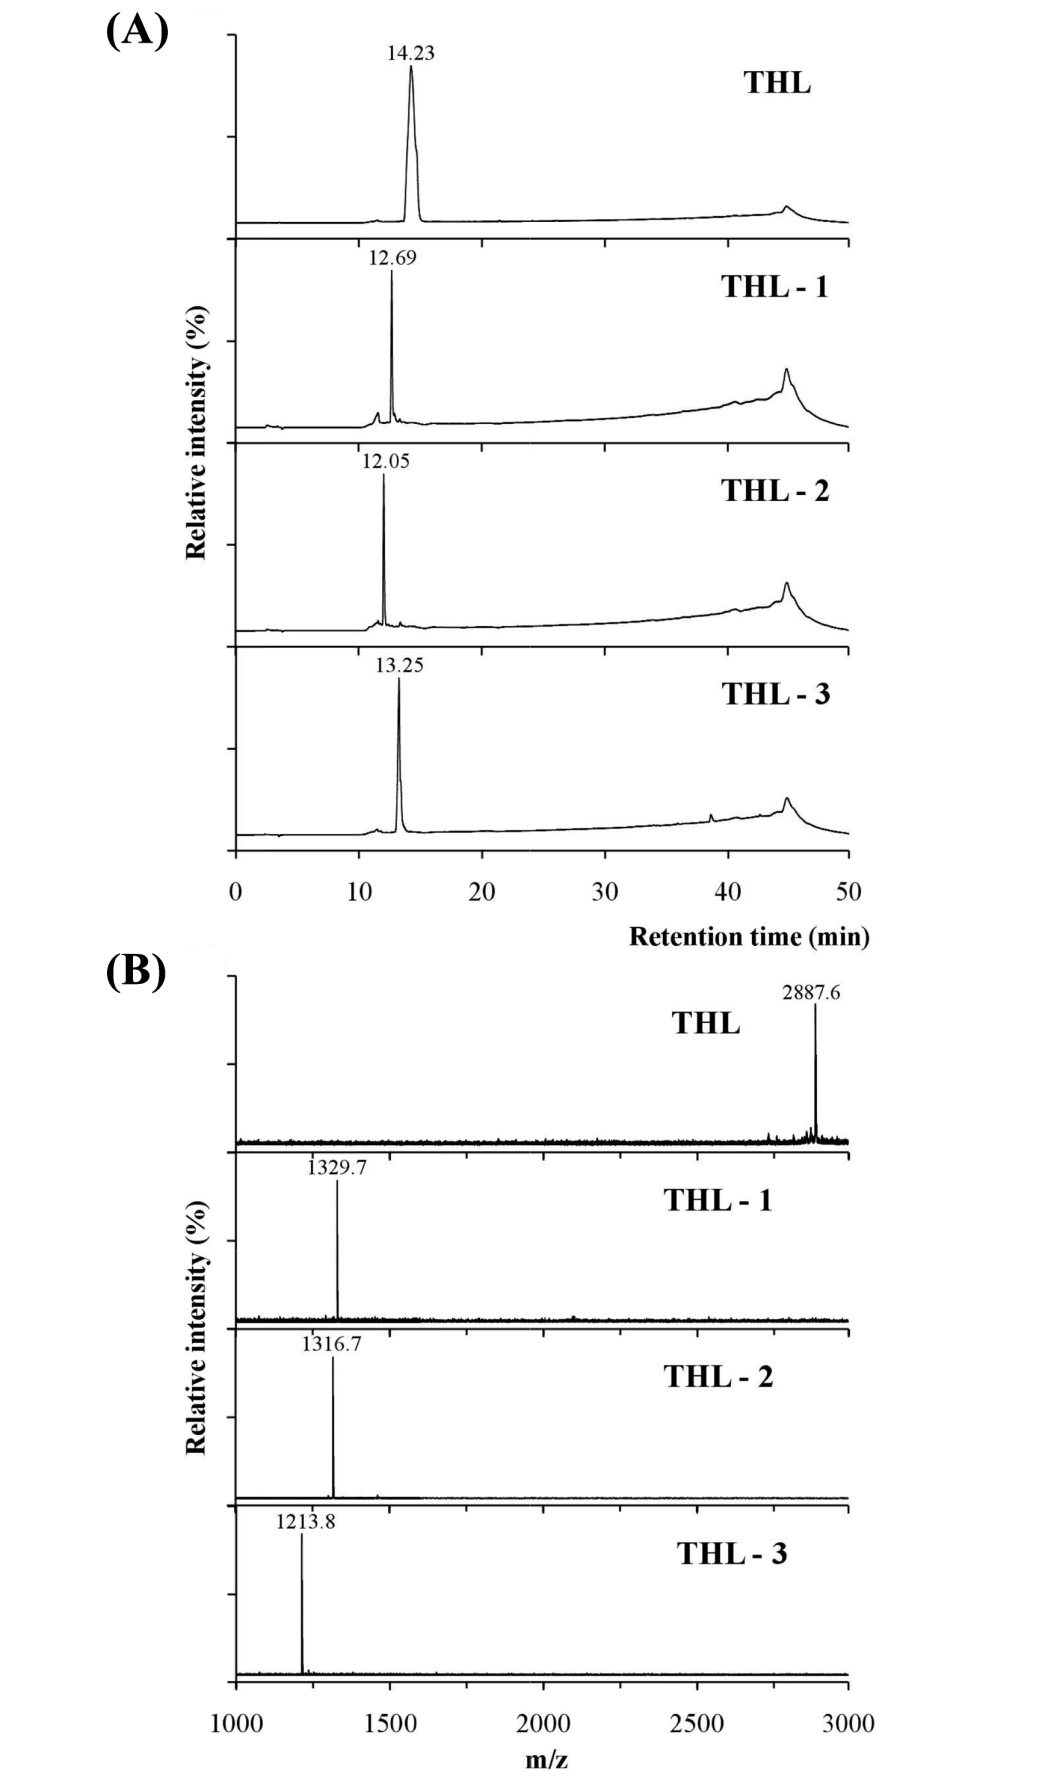


**Supplementary Figure 1.** Qualitative analysis of THL series peptides. (A) Retention time of each peptide was determined by RP-HPLC on C18 column, (B) Molecular weight of each peptide was detected by MALDI-TOF MS.


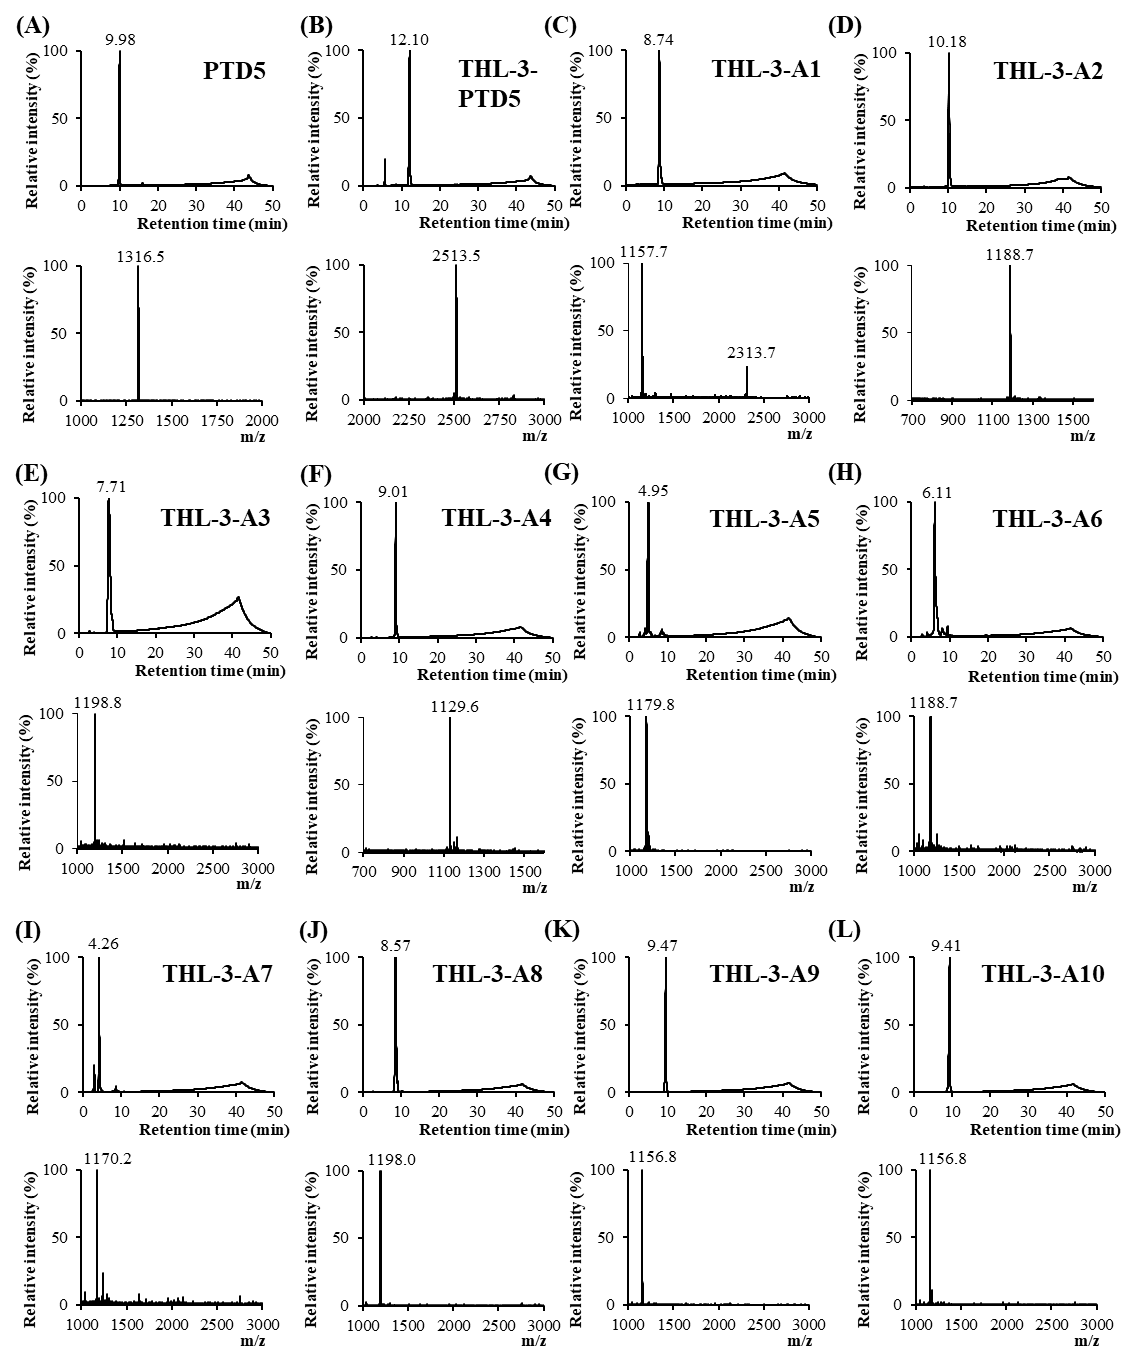


**Supplementary Figure 2.** Qualitative analysis of alanine-scanning / cell-penetrating THL-3 peptides by using RP-HPLC on C18 column and MALDI-TOF MS. Such as (A)PTD5, (B)THL-3-PTD5, and (C) ~ (L) THL-3-A1 to THL-3-A10.


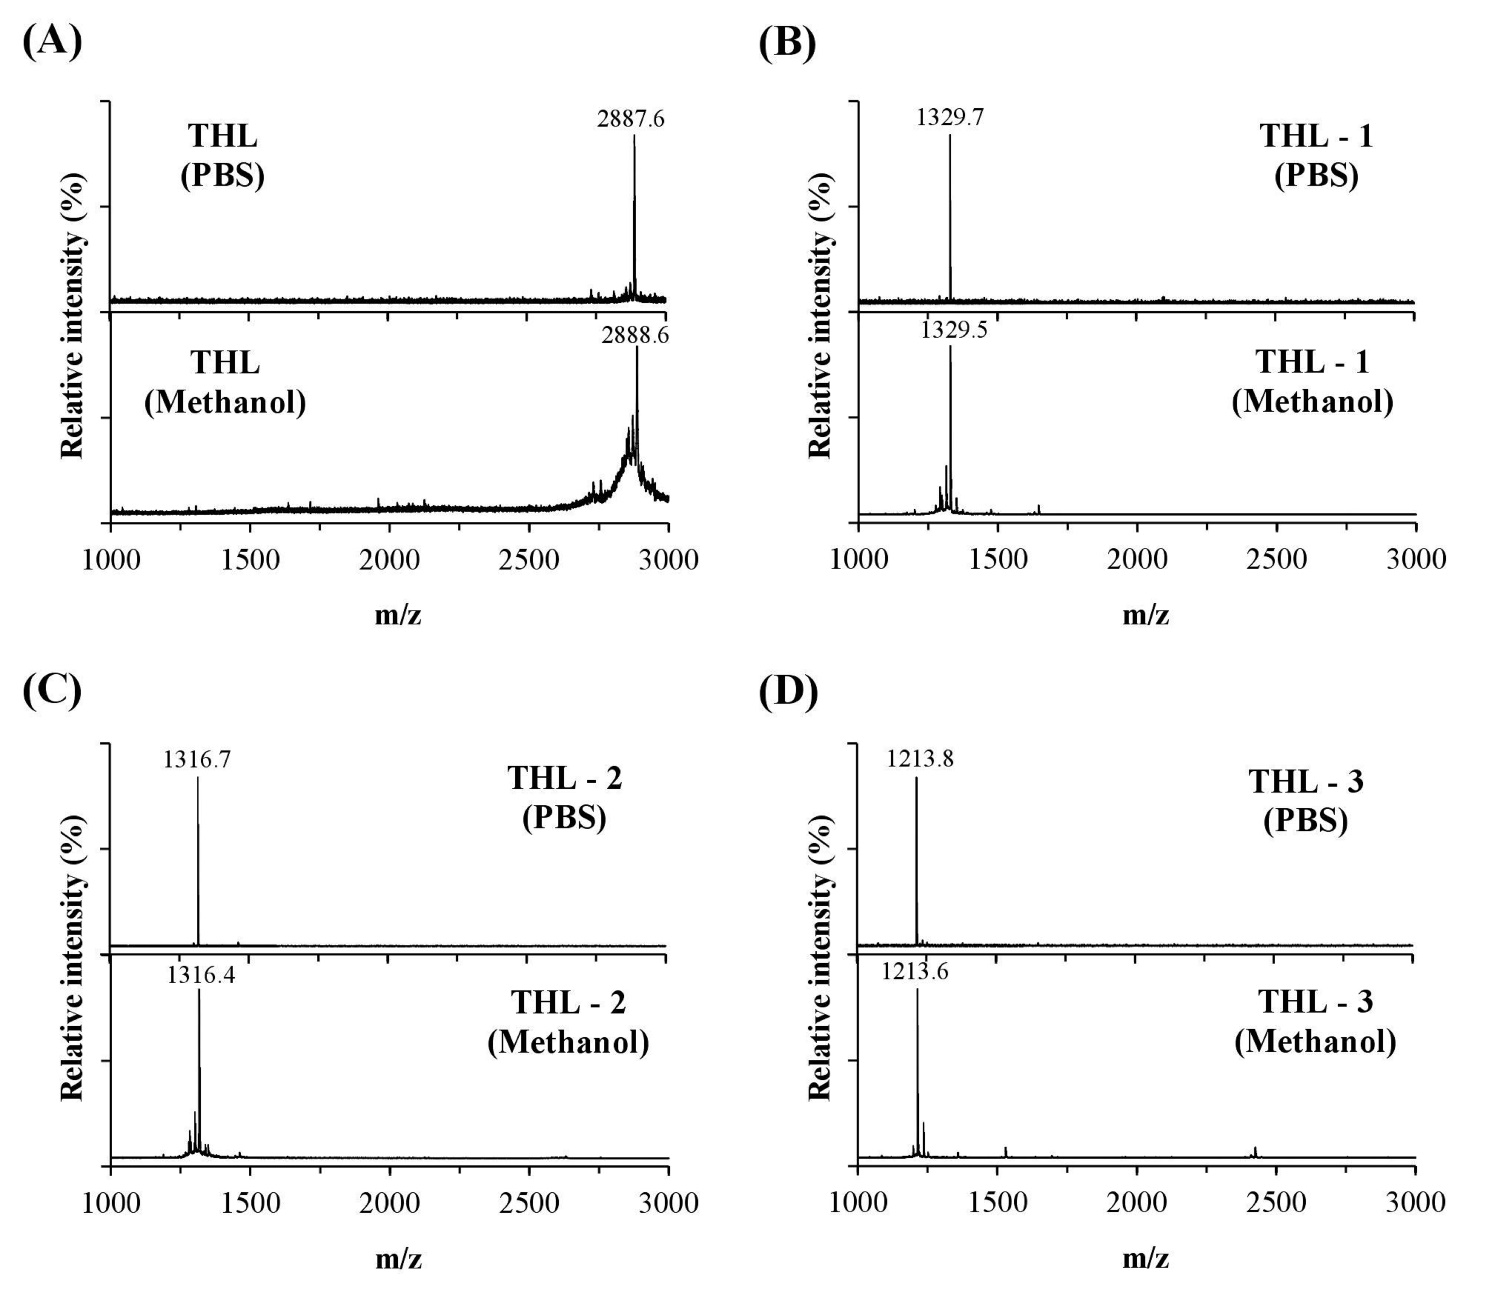


**Supplementary Figure 3.** Analysis of THL series peptide was dissolved in PBS or methanol by using MALDI-TOF MS.
